# Supplementary material
Source: HighWire-hosted journal article supplement (https://bmjopen.bmj.com/content/15/3/e099554)

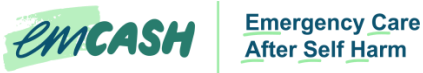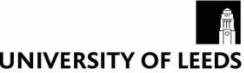

EMERGENCY CARE FOR YOUNG PEOPLE AFTER SELF-HARM: A REALIST REVIEW PROTOCOL

Supplementary file 2. PRISMA-P 2015 Checklist

This checklist has been adapted for use with protocol submissions to *Systematic Reviews* from Table 3 in Moher D et al: Preferred reporting items for systematic review and meta-analysis protocols (PRISMA-P) 2015 statement. *Systematic Reviews* 2015 4:1

| Section/topic              | #  | Checklist item                                                                                                                                                                                  | Information reported     |                          | Line number(s) |
|----------------------------|----|-------------------------------------------------------------------------------------------------------------------------------------------------------------------------------------------------|--------------------------|--------------------------|----------------|
|                            |    |                                                                                                                                                                                                 | Yes                      | No                       |                |
| ADMINISTRATIVE INFORMATION |    |                                                                                                                                                                                                 |                          |                          |                |
| Title                      |    |                                                                                                                                                                                                 |                          |                          |                |
| Identification             | 1a | Identify the report as a protocol of a systematic review                                                                                                                                        | X                        | <input type="checkbox"/> | 1-2            |
| Update                     | 1b | If the protocol is for an update of a previous systematic review, identify as such                                                                                                              | <input type="checkbox"/> | X                        | N/A            |
| Registration               | 2  | If registered, provide the name of the registry (e.g., PROSPERO) and registration number in the Abstract                                                                                        | X                        | <input type="checkbox"/> | 37, 132        |
| Authors                    |    |                                                                                                                                                                                                 |                          |                          |                |
| Contact                    | 3a | Provide name, institutional affiliation, and e-mail address of all protocol authors; provide physical mailing address of corresponding author                                                   | X                        | <input type="checkbox"/> | 4-10           |
| Contributions              | 3b | Describe contributions of protocol authors and identify the guarantor of the review                                                                                                             | X                        | <input type="checkbox"/> | 455-468        |
| Amendments                 | 4  | If the protocol represents an amendment of a previously completed or published protocol, identify as such and list changes; otherwise, state plan for documenting important protocol amendments | <input type="checkbox"/> | X                        | N/A            |

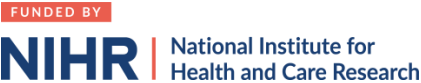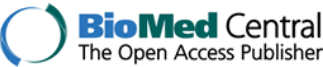

| Section/topic          | #  | Checklist item                                                                                                                                                                                                            | Information reported |                          | Line number(s)                                 |
|------------------------|----|---------------------------------------------------------------------------------------------------------------------------------------------------------------------------------------------------------------------------|----------------------|--------------------------|------------------------------------------------|
|                        |    |                                                                                                                                                                                                                           | Yes                  | No                       |                                                |
| Support                |    |                                                                                                                                                                                                                           |                      |                          |                                                |
| Sources                | 5a | Indicate sources of financial or other support for the review                                                                                                                                                             | X                    | <input type="checkbox"/> | 470-474                                        |
| Sponsor                | 5b | Provide name for the review funder and/or sponsor                                                                                                                                                                         | X                    | <input type="checkbox"/> | 470-474                                        |
| Role of sponsor/funder | 5c | Describe roles of funder(s), sponsor(s), and/or institution(s), if any, in developing the protocol                                                                                                                        | X                    | <input type="checkbox"/> | 449-474                                        |
| INTRODUCTION           |    |                                                                                                                                                                                                                           |                      |                          |                                                |
| Rationale              | 6  | Describe the rationale for the review in the context of what is already known                                                                                                                                             | X                    | <input type="checkbox"/> | 68-111                                         |
| Objectives             | 7  | Provide an explicit statement of the question(s) the review will address with reference to participants, interventions, comparators, and outcomes (PICO)                                                                  | X                    | <input type="checkbox"/> | 113-126, 312 (table 1)                         |
| METHODS                |    |                                                                                                                                                                                                                           |                      |                          |                                                |
| Eligibility criteria   | 8  | Specify the study characteristics (e.g., PICO, study design, setting, time frame) and report characteristics (e.g., years considered, language, publication status) to be used as criteria for eligibility for the review | X                    | <input type="checkbox"/> | 296-310, 312 (table 1), 314-320, 341 (table 2) |
| Information sources    | 9  | Describe all intended information sources (e.g., electronic databases, contact with study authors, trial registers, or other grey literature sources) with planned dates of coverage                                      | X                    | <input type="checkbox"/> | 243-300                                        |
| Search strategy        | 10 | Present draft of search strategy to be used for at least one electronic database, including planned limits, such that it could be repeated                                                                                | X                    | <input type="checkbox"/> | Supplementary files 2 and 3                    |

| Section/topic                      | #   | Checklist item                                                                                                                                                                                                                              | Information reported     |                          | Line number(s)                           |
|------------------------------------|-----|---------------------------------------------------------------------------------------------------------------------------------------------------------------------------------------------------------------------------------------------|--------------------------|--------------------------|------------------------------------------|
|                                    |     |                                                                                                                                                                                                                                             | Yes                      | No                       |                                          |
| STUDY RECORDS                      |     |                                                                                                                                                                                                                                             |                          |                          |                                          |
| Data management                    | 11a | Describe the mechanism(s) that will be used to manage records and data throughout the review                                                                                                                                                | X                        | <input type="checkbox"/> | 289-290, 345-369, 373-388                |
| Selection process                  | 11b | State the process that will be used for selecting studies (e.g., two independent reviewers) through each phase of the review (i.e., screening, eligibility, and inclusion in meta-analysis)                                                 | X                        | <input type="checkbox"/> | 305-320, 341 (table 2), 343-354, 358-374 |
| Data collection process            | 11c | Describe planned method of extracting data from reports (e.g., piloting forms, done independently, in duplicate), any processes for obtaining and confirming data from investigators                                                        | X                        | <input type="checkbox"/> | 358-382                                  |
| Data items                         | 12  | List and define all variables for which data will be sought (e.g., PICO items, funding sources), any pre-planned data assumptions and simplifications                                                                                       | X                        | <input type="checkbox"/> | 358-382                                  |
| Outcomes and prioritization        | 13  | List and define all outcomes for which data will be sought, including prioritization of main and additional outcomes, with rationale                                                                                                        | X                        | <input type="checkbox"/> | 312 (table 1)                            |
| Risk of bias in individual studies | 14  | Describe anticipated methods for assessing risk of bias of individual studies, including whether this will be done at the outcome or study level, or both; state how this information will be used in data synthesis                        | X                        | <input type="checkbox"/> | 343-350                                  |
| DATA                               |     |                                                                                                                                                                                                                                             |                          |                          |                                          |
| Synthesis                          | 15a | Describe criteria under which study data will be quantitatively synthesized                                                                                                                                                                 | X                        | <input type="checkbox"/> | 386-420                                  |
|                                    | 15b | If data are appropriate for quantitative synthesis, describe planned summary measures, methods of handling data, and methods of combining data from studies, including any planned exploration of consistency (e.g., $I^2$ , Kendall's tau) | <input type="checkbox"/> | X                        | N/A                                      |
|                                    | 15c | Describe any proposed additional analyses (e.g., sensitivity or subgroup analyses, meta-regression)                                                                                                                                         | <input type="checkbox"/> | X                        | N/A                                      |

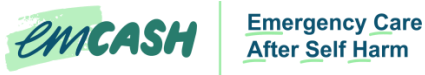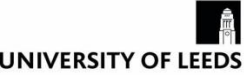

| Section/topic                     | #   | Checklist item                                                                                                              | Information reported |                          | Line number(s) |
|-----------------------------------|-----|-----------------------------------------------------------------------------------------------------------------------------|----------------------|--------------------------|----------------|
|                                   |     |                                                                                                                             | Yes                  | No                       |                |
|                                   | 15d | If quantitative synthesis is not appropriate, describe the type of summary planned                                          | X                    | <input type="checkbox"/> | 386-420        |
| Meta-bias(es)                     | 16  | Specify any planned assessment of meta-bias(es) (e.g., publication bias across studies, selective reporting within studies) | X                    | <input type="checkbox"/> | 343-350        |
| Confidence in cumulative evidence | 17  | Describe how the strength of the body of evidence will be assessed (e.g., GRADE)                                            | X                    | <input type="checkbox"/> | 343-350        |

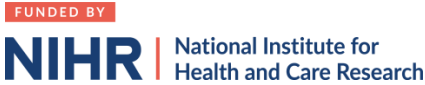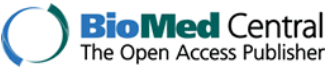

Supplement: inline-supplementary-material-1 [file inline-supplementary-material-1.pdf]
